# Supplementary material for: The construction of novel and efficient hafnium catalysts using naturally existing tannic acid for Meerwein–Ponndorf–Verley reduction
Source: PubMed Central journal article supplement — RSC Adv. 2020 Feb 14;10(12):6944–52. doi: 10.1039/c9ra10317a (PMC9049710; doi:10.1039/c9ra10317a), 2020-02-14
Supplement: RA-010-C9RA10317A-s001.pdf [file RA-010-C9RA10317A-s001.pdf]

## *Electronic Supporting Information*

# **Construction of novel and efficient hafnium catalysts using naturally existing tannic acid for Meerwein-Ponndorf-Verley Reduction**

*Xiaolu Wang<sup>1</sup>, Jianxiu Hao<sup>1</sup>, Lijuan Deng<sup>2</sup>, Hongye Zhao<sup>1</sup>, Quansheng Liu<sup>1</sup>, Na Li<sup>1</sup>, Runxia He<sup>1</sup>, Keduan Zhi<sup>1</sup>, Huacong Zhou<sup>1\*</sup>.*

<sup>1</sup> College of Chemical Engineering, Inner Mongolia University of Technology; Inner Mongolia Key Laboratory of High-Value Functional Utilization of Low Rank Carbon Resources, Hohhot 010051, Inner Mongolia, China.

<sup>2</sup> Hohhot No. 2 High School, Hohhot 010010, Inner Mongolia, China

\* Corresponding author E-mail: [hezhou@imut.edu.cn](mailto:hezhou@imut.edu.cn)

### **Contents**

|                                                                                                                                                 |   |
|-------------------------------------------------------------------------------------------------------------------------------------------------|---|
| Product analysis .....                                                                                                                          | 2 |
| <b>Figure S1</b> Element mapping images of Hf-TA. ....                                                                                          | 3 |
| <b>Table S1</b> CTH reaction of FD to produce FA catalyzed by various catalysts. ....                                                           | 3 |
| <b>Figure S2</b> SEM image and TEM image of the recycled Hf-TA catalyst after 10 cycles. ....                                                   | 4 |
| <b>Figure S3</b> XRD patterns and nitrogen adsorption desorption isotherms of the fresh Hf-TA and recycled Hf-TA catalyst after 10 cycles. .... | 4 |
| <b>Table S2</b> Surface area, volume and Hafnium content of different catalysts. ....                                                           | 5 |
| <b>Figure S4</b> XPS spectra of Hf 4f and O1s in the fresh Hf-TA and recycled Hf-TA catalyst after 10 cycles. ....                              | 5 |
| <b>Figure S5</b> NH <sub>3</sub> -TPD spectra of Hf-TA. ....                                                                                    | 6 |
| <b>References</b> .....                                                                                                                         | 6 |

## Product analysis

FD (furfuraldehyde), FA (furfuryl alcohol), and other liquid substrates conversion and products yield were quantitatively analysed by gas chromatography (GC, Techcomp 7900) with a FID (flame ionization detector) using decane as the GC internal standard. The products were identified by GC-MS (Agilent 7890B-7000D). The conversion of substrates (e.g., FD) and yields of products (e.g., FA) were calculated based on standard curves ( $R^2 \geq 0.9994$ ) of corresponding commercial samples in five gradient concentrations along with a certain amount of internal standard (decane).<sup>1, 2</sup> Substrate conversion (Conv, %), product yield (Yield, %) and selectivity (Sel, %) were calculated using the following equations:

$$\text{Conv (\%)} = [1 - (\text{mole of substrate after reaction}) / (\text{mole of initial substrate})] \times 100 \%$$

$$\text{Yield (\%)} = (\text{mole of the obtained product}) / (\text{the theoretical mole of the product under total conversion of the initial substrate}) \times 100 \%$$

$$\text{Sel (\%)} = (\text{product yield}) / (\text{substrate conversion}) \times 100 \%$$

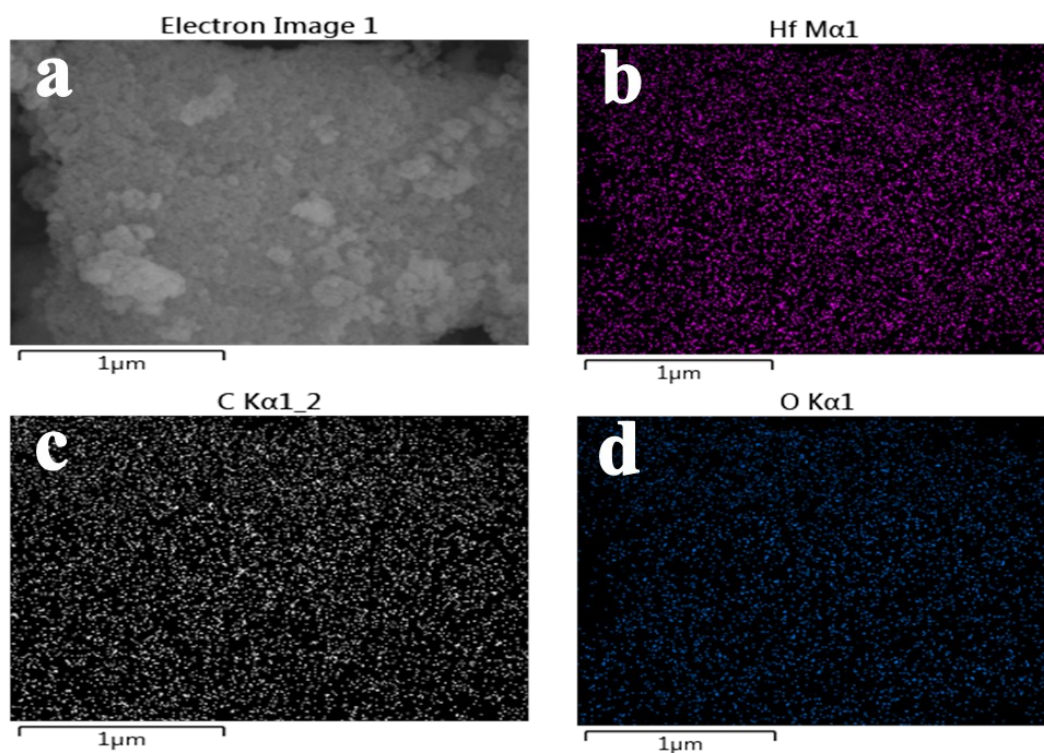

**Figure S1** Element mapping images of Hf-TA: (a) scanning range of the EDS mapping, (b) Hf element, (c) C element, and (d) O element.

**Table S1** CTH reaction of FD to produce FA catalyzed by various catalysts.<sup>a</sup>

| <chem>C1=CC=C(C=C1)C=O &gt;&gt; C1=CC=C(C=C1)CO</chem><br>2-PrOH<br>catalyst |                     |           |            |          |
|------------------------------------------------------------------------------|---------------------|-----------|------------|----------|
| Entry                                                                        | Catalyst type       | Conv. (%) | Yield. (%) | Sel. (%) |
| 1                                                                            | Hf-TA               | 97.2      | 96.2       | 98.9     |
| 2                                                                            | Zr-TA               | 62.6      | 45.4       | 72.5     |
| 3                                                                            | Al-TA               | 19.4      | 7.8        | 40.2     |
| 4                                                                            | Cr-TA               | 14.7      | 4.1        | 27.9     |
| 5                                                                            | Sn-TA               | 12.1      | 6.8        | 56.2     |
| 6                                                                            | Fe-TA               | 4.9       | 4.3        | 87.7     |
| 7                                                                            | Cu-TA               | 4.8       | 3.3        | 68.8     |
| 8                                                                            | HfCl <sub>4</sub>   | 60.3      | 3.6        | 5.9      |
| 9                                                                            | HfO <sub>2</sub>    | 20.0      | 4.0        | 20.0     |
| 10                                                                           | Hf(OH) <sub>4</sub> | 4.0       | 1.0        | 25.0     |

<sup>a</sup> Typical reaction conditions were as follows except otherwise stated in the table: FD 1 mmol, 2-PrOH 5 mL, catalyst 200 mg, reaction temperature 70 °C, reaction time 5 h

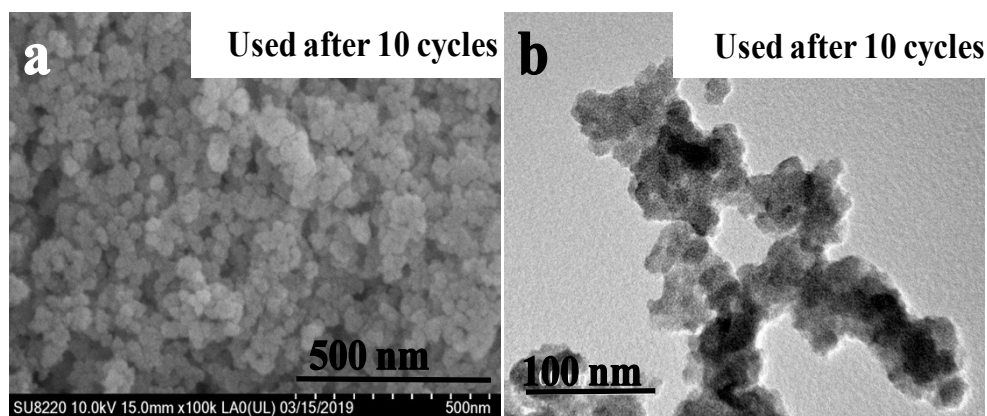

**Figure S2** SEM image (a) and TEM image (b) of the recycled Hf-TA catalyst after 10 cycles.

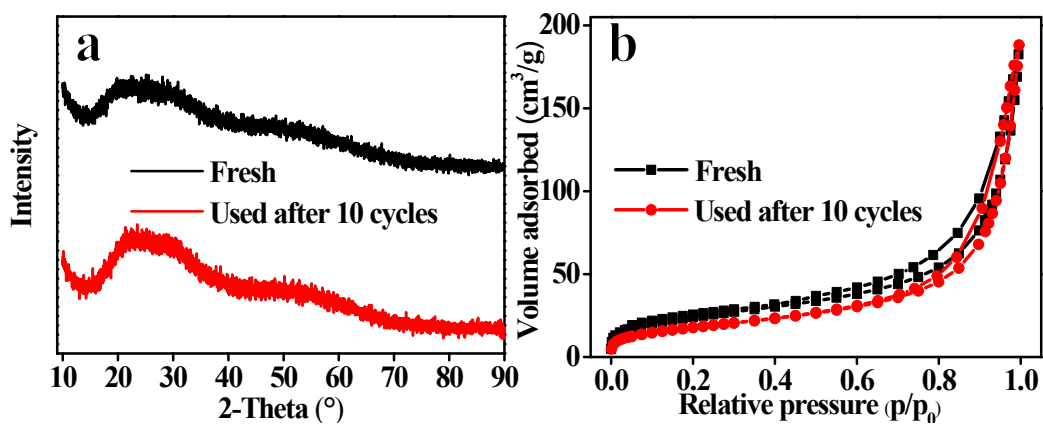

**Figure S3** XRD patterns (a) and nitrogen adsorption-desorption isotherms (b) of the fresh Hf-TA and recycled Hf-TA catalyst after 10 cycles.

**Table S2** Surface area, volume and Hf content of different catalysts.

| Catalyst                  | $S_{\text{BET}}$ ( $\text{m}^2/\text{g}$ ) <sup>a</sup> | $V_{\text{pore}}$ ( $\text{cm}^3/\text{g}$ ) <sup>b</sup> | $D_{\text{mean}}$ (nm) <sup>c</sup> | $P_{\text{size}}$ (nm) <sup>d</sup> | $\text{ICP}_{\text{Hf}}$ (%) <sup>e</sup> |
|---------------------------|---------------------------------------------------------|-----------------------------------------------------------|-------------------------------------|-------------------------------------|-------------------------------------------|
| Fresh Hf-TA               | 87.8                                                    | 0.2                                                       | 12.9                                | 68.4                                | 35.3                                      |
| Reused Hf-TA <sup>f</sup> | 66.0                                                    | 0.2                                                       | 17.6                                | 90.9                                | 34.5                                      |

<sup>a</sup>  $S_{\text{BET}}$ : BET surface area was obtained from  $\text{N}_2$  adsorption isotherm. <sup>b</sup>  $V_{\text{pore}}$ : Volume of pores. <sup>c</sup>  $D_{\text{mean}}$ : Adsorption average pore diameter. <sup>d</sup>  $P_{\text{size}}$ : Average particle size. <sup>e</sup>  $\text{ICP}_{\text{Hf}}$ : ICP-OES detected hafnium content. <sup>f</sup> Hf-TA: Used Hf-TA after 10 cycles.

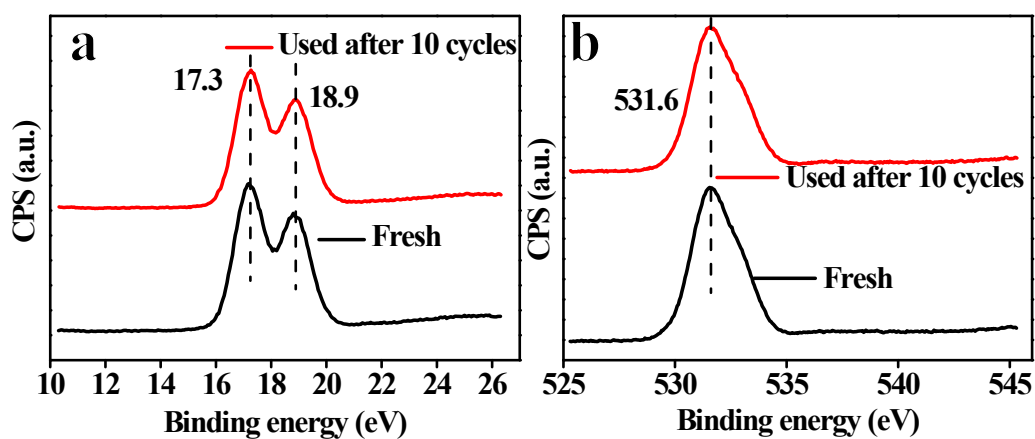

**Figure S4** XPS spectra of Hf 4f (a) and O 1s (b) in the fresh Hf-TA and recycled Hf-TA catalyst after 10 cycles.

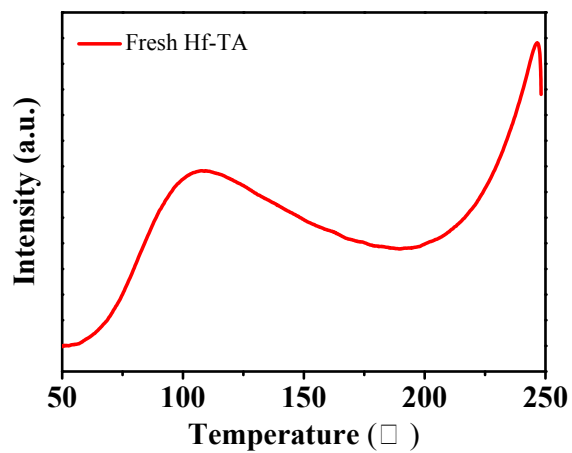

**Figure S5** NH<sub>3</sub>-TPD spectra of Hf-TA. Due to the decomposition temperature of the as-prepared catalyst was about 250 °C, the test could conduct under the temperature lower than 250 °C.

## References

1. H. Li, T. Yang and Z. Fang, *Applied Catalysis B: Environmental*, 2018, **227**, 79-89.
2. W. Wu, Y. Li, H. Li, W. Zhao and S. Yang, *Catalysts*, 2018, **8**, 264-278.
